# Supplementary material for: EZH2 -Deficient T-cell Acute Lymphoblastic Leukemia Is Sensitized to CHK1 Inhibition through Enhanced Replication Stress
Source: Oxford University Press journal article supplement (doi:10.1158/2159-8290.cd-19-0789), 2020-04-29
Supplement: 21598290cd190789-sup-225160_2_supp_6246230_q954c0.xlsx [file 21598290cd190789-sup-225160_2_supp_6246230_q954c0.xlsx]

## Sheet: Sheet1
	Experiment 1	Experiment 2	Experiment 1	Experiment 2	Student's t-Test
	Cell viability (% of DMSO)
	EZH2-WT	EZH2-WT	EZH2-KO1	EZH2-KO1	p value
Veliparib (ABT-888)	94.6844	108.564	111.619	98.2301	0.764759
Belinostat (PXD101)	0.363588	0.403246	0.43758	0.370233	0.652366
Danusertib (PHA-739358)	45.608	67.5691	91.266	99.2759	0.0804362
SNS-314 Mesylate	67.1096	93.9227	89.0224	94.5294	0.497159
JNJ-7706621	44.1728	83.2873	97.9167	65.8005	0.548104
CCT129202	60.0598	83.9088	95.3526	97.1842	0.179415
AG-14361	99.2027	108.425	104.087	94.6903	0.570672
FG-4592	95.6146	108.08	111.779	103.459	0.521694
Iniparib (BSI-201)	95.3488	107.942	110.337	102.655	0.578352
Mocetinostat (MGCD0103)	1.60598	1.35704	2.07532	0.719469	0.914024
Valproic acid sodium salt (Sodium valproate)	101.462	107.735	108.814	99.3564	0.936198
Ruxolitinib (INCB018424)	101.063	104.075	109.696	75.712	0.621494
Hesperadin	101.262	108.978	113.301	109.895	0.264275
LY2784544	90.0332	101.657	94.7115	84.3121	0.502006
NVP-BSK805 2HCl	87.1096	105.801	104.087	100	0.618251
MK-5108 (VX-689)	34.5183	60.7735	77.524	86.6452	0.131478
Baricitinib (LY3009104, INCB028050)	100.066	92.4724	99.0385	77.313	0.554687
Panobinostat (LBH589)	0.178007	0.233011	0.189984	0.169429	0.472183
PCI-24781 (Abexinostat)	0.354751	0.350207	0.359135	0.310941	0.545998
SRT1720	102.06	97.6519	113.301	104.988	0.187045
CYC116	44.4319	55.5387	65.5609	89.6219	0.17261
Resveratrol	107.442	107.597	117.308	81.6573	0.696255
EX 527 (Selisistat)	104.85	105.525	115.304	90.9091	0.880283
SGI-1776 free base	93.4219	107.044	92.7083	95.0925	0.456436
TG101209	10.3987	11.837	18.6619	12.9606	0.25147
M344	0.540997	0.529765	0.547756	0.444248	0.528348
WHI-P154	101.395	96.0635	94.8718	91.6331	0.221189
Trichostatin A (TSA)	0.0642458	0.0960635	0.0502163	0.0474578	0.188886
LAQ824 (Dacinostat)	0.234086	0.261395	0.246875	0.216412	0.513765
INO-1001	102.724	106.699	114.824	102.655	0.593475
ENMD-2076	10.9967	15.2486	36.7228	40.1207	0.0113744
Droxinostat	80.9302	97.8591	100.561	99.4368	0.337722
Azacitidine	25.1296	53.232	20.3926	35.0362	0.544457
AZ 960	13.5017	17.355	73.9263	49.7828	0.0628654
Resminostat	58.3854	70.9254	61.2179	65.7522	0.876826
Tofacitinib (CP-690550,Tasocitinib)	103.987	106.285	105.128	103.298	0.594167
S-Ruxolitinib (INCB018424)	102.924	96.0635	113.301	79.2438	0.869995
Vorinostat (SAHA, MK0683)	1.48372	9.62017	0.222756	0.234111	0.320843
Quisinostat (JNJ-26481585)	0.276611	0.323204	0.386458	0.348592	0.153094
Alisertib (MLN8237)	45.8605	50.1796	98.8782	102.816	0.00304611
CUDC-101	0.37608	0.309669	0.461699	0.392518	0.221041
Aurora A Inhibitor I	100.465	17.3204	71.4183	41.6251	0.962061
PCI-34051	102.525	103.384	109.455	104.344	0.267309
CYT387	88.3721	106.008	110.737	90.9091	0.809919
TAK-901	13.4817	101.657	116.747	108.769	0.33872
WP1066	102.326	104.834	111.138	88.6565	0.775631
IOX2	103.189	93.4392	113.942	94.4489	0.643471
VX-680 (Tozasertib, MK-0457)	60.4718	76.7265	104.728	105.712	0.0460478
Rucaparib (AG-014699,PF-01367338)	94.6179	92.8867	110.737	100.805	0.139937
AT9283	31.2093	32.8246	84.0545	51.3194	0.161448
Decitabine	19.6146	22.6727	28.6538	34.1191	0.0821104
PHA-680632	83.5216	95.1657	103.926	96.6211	0.252737
KW-2449	89.6346	96.8232	104.087	88.0933	0.775156
Tubacin	95.5482	103.522	109.215	88.0129	0.942574
AMG-900	48.7176	67.6243	100.721	101.529	0.0452556
Sirtinol	103.92	104.489	109.776	103.62	0.504518
Romidepsin (FK228, Depsipeptide)	0.32505	0.300967	0.333253	0.28037	0.850875
Entinostat (MS-275)	15.352	10.7396	19.2545	3.70314	0.86464
MLN8054	39.9128	70.23	83.2905	97.9342	0.169174
AG-490 (Tyrphostin B42)	95.9502	101.429	91.7738	103.749	0.900794
PFI-1 (PF-6405761)	98.6916	101.74	103.085	107.575	0.200157
MC1568	96.947	102.983	92.6735	102.142	0.693447
AZD1480	86.6044	96.706	81.0411	88.5998	0.391845
Quercetin	100.187	101.616	94.6658	97.4751	0.0919726
TG101348 (SAR302503)	21.8131	37.2032	31.0283	32.479	0.798775
CEP-33779	68.2866	94.3443	55.4627	85.8454	0.647492
Entacapone	94.2679	91.9204	88.6889	89.365	0.0795709
Olaparib (AZD2281, Ku-0059436)	87.6636	98.3219	86.7609	101.76	0.903033
ZM 447439	82.9907	89.683	93.7018	102.295	0.165559
Barasertib (AZD1152-HQPA)	95.3271	101.305	91.1954	100.536	0.701702
2-Methoxyestradiol (2-MeOE2)	1.38069	1.54755	3.16774	1.98546	0.203421
Pracinostat (SB939)	0.430343	0.390242	0.396208	0.380643	0.416271
Givinostat (ITF2357)	0.527539	0.473648	0.476414	0.45264	0.345378
Tubastatin A HCl	101.869	99.9378	94.5373	97.3221	0.0991103
CCT137690	78.9408	93.1635	79.4344	99.0054	0.817922
CI994 (Tacedinaline)	85.8567	94.4065	81.6838	95.1033	0.847336
Sodium Phenylbutyrate	95.8255	94.5308	92.8021	96.7865	0.8715
CUDC-907	0.42243	0.426973	0.412725	0.41492	0.0497928
RG108	97.8193	99.0056	98.5219	103.06	0.417246
Tranylcypromine (2-PCPA) HCl	100.997	101.429	93.8946	101.989	0.504339
Procainamide HCl	101.745	101.181	99.1645	99.7705	0.0404228
Tofacitinib (CP-690550) Citrate	102.243	104.288	97.8149	103.29	0.451189
AZD2461	96.7601	102.921	92.7378	99.694	0.516967
XL019	99.5639	96.8925	88.2391	90.3596	0.0345968
CX-6258 HCl	18.6293	17.2032	3.25257	79.9541	0.599824
BMN 673	64.4237	75.7613	67.2237	70.7728	0.870826
GSK126	92.5857	95.4009	89.4602	89.4415	0.084092
EPZ5676	89.8442	98.3841	93.8946	98.3168	0.718942
3-Deazaneplanocin A (DZNeP)	72.5234	77.7502	66.9666	77.5822	0.676316
RG2833 (RGFP109)	96.947	101.305	96.2725	98.3168	0.526173
PFI-3	101.246	102.61	99.1645	103.52	0.821272
MG149	101.371	103.418	96.7866	100.383	0.206906
Filgotinib (GLPG0634)	103.24	100.186	96.5296	100.077	0.282374
CPI-360	100.374	91.7961	97.6864	98.6228	0.678775
GSK503	98.8785	95.3387	91.0668	97.0926	0.477418
Scriptaid	9.25857	3.60348	3.16645	0.757995	0.283136
GSK J4 HCl	89.4704	94.7172	86.1183	98.7758	0.963567
EPZ-6438	99.2523	83.5301	99.4216	101.989	0.362765
Bromosporine	91.7134	77.6259	99.1645	103.52	0.152145
PFI-2	99.7508	101.305	101.221	98.2402	0.682003
4SC-202	0.854206	1.18645	1.32776	1.18516	0.321506
UNC0631	93.0218	99.1299	96.3368	96.7865	0.888526
SirReal2	96.947	96.6439	91.1311	99.694	0.777466
Tubastatin A	93.3956	92.542	93.8946	97.3221	0.273638
C646	99.8131	92.7906	101.992	98.4698	0.422553
IOX1	101.869	94.5308	100.835	97.5516	0.827831
TMP269	101.495	98.757	98.9075	100	0.693022
UNC0379	97.2586	100.373	93.1234	96.251	0.202281
EI1	101.246	95.1523	96.0154	90.5126	0.352337
SP2509	23.3084	34.9037	15.5206	11.951	0.126804
PFI-4	98.5047	95.0901	84.7044	96.404	0.41333
Lomeguatrib	89.4081	93.6607	91.6452	93.6496	0.682504
SGC 0946	86.8117	100.149	101.599	100.04	0.388442
GSK343	98.6404	96.7238	94.1134	96.5074	0.261993
OG-L002	97.3487	101.266	94.9128	97.23	0.290955
RVX-208	99.864	104.021	101.817	104.938	0.636344
EPZ004777	89.9388	99.7022	94.5494	104.055	0.578264
GSK-LSD1 2HCl	97.7566	101.117	106.25	102.128	0.215843
CPI-169	96.465	92.6284	97.8198	96.4271	0.333997
OF-1	72.1278	73.8496	75.5087	73.7937	0.304687
Rocilinostat (ACY-1215)	72.3997	86.5972	81.7587	90.8069	0.504865
Pacritinib (SB1518)	53.2631	82.2785	83.4302	78.1453	0.470501
UNC1215	92.3182	101.936	104.506	99.9599	0.438393
UNC1999	97.2808	98.8086	88.3721	96.2666	0.290446
SGC-CBP30	101.224	101.638	90.407	97.23	0.1558
ML324	95.9891	102.978	92.0058	103.091	0.795562
OTX015	61.6111	91.9583	72.0131	99.0767	0.70855
GSK J1	100.34	101.862	106.613	102.208	0.291367
MI-2 (Menin-MLL Inhibitor)	91.0945	94.4155	92.8052	96.2666	0.535132
ZM 39923 HCl	96.601	100.372	97.0203	99.5584	0.938752
AZD1208	88.9871	101.191	99.2006	97.23	0.66327
I-BET-762	88.3073	85.927	102.616	107.186	0.0203461
MM-102	100.748	100.968	94.4041	98.8358	0.196294
PJ34 HCl	99.2522	103.202	97.6744	103.493	0.871656
UNC669	85.5201	101.936	96.9477	104.135	0.526433
MI-3 (Menin-MLL Inhibitor)	83.0727	93.522	90.407	96.3468	0.486982
EPZ015666	95.1054	96.8727	98.0378	97.7118	0.170718
SMI-4a	81.8491	95.2345	88.0814	98.0329	0.642461
RGFP966	38.6404	77.662	91.061	82.3766	0.289169
(+)-JQ1	56.3358	85.4058	78.7791	86.8727	0.511206
RGFP966	39.8708	85.1824	85.1017	99.5584	0.336769
SGI-1027	85.656	99.7022	92.4419	100.923	0.673813
CPI-203	60.639	88.9799	83.2849	98.1132	0.425143
ME0328	90.8226	98.7342	102.398	102.85	0.186231
Anacardic Acid	101.632	101.266	107.703	100.923	0.487615
GSK1324726A (I-BET726)	51.1693	85.7781	75.7994	92.4127	0.500962
BIX 01294	88.7152	99.8511	90.0436	99.3175	0.961243
GSK-LSD1	101.088	98.3619	96.2209	90.7266	0.178379
Zebularine	97.6886	109.829	103.706	93.8579	0.589476
GSK2801	99.6601	97.6917	94.0407	102.288	0.915006
JIB-04	2.70292	2.19732	6.24419	4.50662	0.0838184
MS436	100.204	100.223	103.924	103.171	0.0125201
Nexturastat A	74.5751	91.4371	89.0262	101.004	0.365408
BRD4770	97.5527	96.6493	98.0378	98.9161	0.160601
Remodelin	93.0659	98.5853	92.8779	88.7194	0.282948
ORY-1001 (RG-6016)	97.6207	96.8727	101.453	97.23	0.431638
UPF 1069	85.9279	97.9151	100.363	92.5733	0.5898
A-366	95.8532	93.4475	88.1541	88.2377	0.033056
BAZ2-ICR	97.1448	99.7022	101.672	96.4271	0.850023
GSK484	98.0965	99.4788	99.2006	99.2373	0.596433
I-BRD9	95.4453	99.4043	89.3895	90.8872	0.0749995
I-CBP112	100	99.9255	95.3488	100.682	0.541286
MS049	92.998	98.3619	102.616	101.967	0.134158
NI-57	95.2413	93.522	96.1483	91.6098	0.855083
OICR-9429	96.1251	101.042	96.2209	96.5877	0.469963
SGC707	98.2325	95.9792	97.0203	96.9892	0.936702
UNC0638	89.191	97.5428	100.436	93.617	0.567261
UNC0642	98.0286	97.6173	94.2587	81.4934	0.259636
T0901317	103.23	100.56	90.2083	101.464	0.404792
GW3965 HCl	99.2275	98.2414	102.986	100.366	0.170372
ATRA (all-trans retinoic acid)	94.0309	96.0831	94.5833	92.3147	0.403415
9-CIS RA	90.0983	93.0456	85.1389	91.4913	0.450488
13-CIS RA	93.3287	84.8122	99.3056	102.196	0.121737
AC-55649	93.75	103.118	93.125	102.47	0.932169
Tazarotene	97.5421	97.9217	88.4722	90.0732	0.0093258
BMS753	98.8062	90.4876	100.556	100.274	0.300049
TAMIBAROTENE (AM80)	96.1376	94.5643	96.25	92.7722	0.702876
AM 580	100.07	86.3309	89.9306	97.4382	0.95634
AC-261066	101.194	101.998	94.8611	100.366	0.288557
Adapalene	69.5435	88.809	75.2778	82.4703	0.97922
CD 437	21.2851	38.4572	14.5764	18.957	0.277266
CD 1530	99.0871	97.2822	91.0417	100.457	0.66195
CD 2665	100.421	77.0424	85.1389	98.7191	0.835059
MM 11253	85.1124	97.3621	100.069	100.366	0.280343
LE 135	77.5281	87.7698	71.7361	85.892	0.703558
BMS 493	87.0787	93.8449	89.4444	99.634	0.573575
BMS 453	100.492	95.9233	96.1111	98.9936	0.830966
Bexarotene(LGD1069)	98.0337	70.3597	80.9028	71.2992	0.63597
LG 101506	104.565	102.158	104.444	105.764	0.331829
CD 3254	85.323	95.5236	100.278	102.379	0.171272
SR 11237(BMS649)	99.8596	97.6819	95.9722	103.294	0.842356
UVI3003	96.1376	100.24	86.1111	98.1702	0.442529
LG100754	96.4185	90.0879	95.0694	102.013	0.377271
HX531	89.8174	101.759	104.236	100.183	0.41561
HX630	92.3455	99.6003	94.1667	100.732	0.791306
TTNPB (AROTINOID)	80.9691	90.5675	95.1389	100.183	0.159529
FENRETINIDE (4-HPR)	77.3876	91.207	89.5833	101.006	0.344731
AC-93253	29.1573	14.7402	27.6736	32.699	0.393397
Thalidomide	104.916	80.8153	86.3889	90.6221	0.75565
MK8776	86.5871	94.4045	22.2292	42.5435	0.0333333
Doxorubicin	75.9129	98.1615	97.3611	101.006	0.393945
SB 203580	102.177	98.3213	103.75	98.5361	0.808651
Thapsigargin	100.983	96.3229	88.4028	100.732	0.598506
Dexamethasone	105.899	93.5252	94.9306	100	0.76882
Nelarabine	85.8146	99.2006	94.9306	102.104	0.511643
GDC-0941 (Pictilisib)	89.0449	93.2054	99.1667	100.366	0.0574174
L-685,458	89.677	92.486	101.667	101.555	0.0173579
NPM (N-phenylmaleimide)	96.6994	97.2022	106.181	97.5297	0.375118
MRK-003	101.264	83.3733	91.5278	91.7658	0.946968
MRK60	37.7458	63.1575	48.2917	70.1464	0.653047
SJB4-114	92.7669	95.6835	102.569	100.183	0.0629447
Go 6976	94.2416	94.8042	93.5417	94.8765	0.707083
Ibrutinib	90.5899	99.0408	89.4444	97.9872	0.871669
Carmofur	104.143	97.2822	91.5278	100.64	0.502276
Etoposide	11.7767	4.76099	6.55417	5.03568	0.561869
Dasatinib	89.3258	86.4109	91.1111	88.4721	0.431122
ThZ1	88.0618	92.486	103.056	98.1702	0.0883418
Vincristine	0.515871	0.633573	0.739583	0.84172	0.109282
5FU (Fluorouracil)	91.4326	74.8521	89.2361	96.1574	0.398957
