# Supplementary material for: EZH2 -Deficient T-cell Acute Lymphoblastic Leukemia Is Sensitized to CHK1 Inhibition through Enhanced Replication Stress
Source: Oxford University Press journal article supplement (doi:10.1158/2159-8290.cd-19-0789), 2020-04-29
Supplement: 21598290cd190789-sup-225160_2_supp_6246231_q954c0.xlsx [file 21598290cd190789-sup-225160_2_supp_6246231_q954c0.xlsx]

## Sheet: Sheet1
Supplementary Table 3. Mutations identified by exome sequencing in Liu et al., 2017 T-ALL cohort (related to Supplementary Figure S6A)
Mutations likely to decrease H3K27me3					Mutations likely to increase H3K27me3
SUZ12	EZH2	EED	ASXL1	WHSC1	WHSC1	EP300	KDM6A
F432_E12splice	C289R	D341N	R693*	T1150A	F718fs	Q1797*	V1112fs
WinsE601	D657G	N286fs	D690fs				V1112fs
Q431R	E745K	E276*					G58fs
Q95K	P132T						V1110_V1113del
D275_E7splice	R684C						S418C
E261*	V19_S21fs						R1111fs
R423*	S280C						V1113fs
G518R	C571S						G1242D
R286*	Y733H						C1234R
	L739fs						E1049_E20splice_region
	C565Y						M1291fs
	Q653K						W1096*
	P563L						V1113_A1115fs
	R684H
