# Supplementary material for: EZH2 -Deficient T-cell Acute Lymphoblastic Leukemia Is Sensitized to CHK1 Inhibition through Enhanced Replication Stress
Source: Oxford University Press journal article supplement (doi:10.1158/2159-8290.cd-19-0789), 2020-04-29
Supplement: 21598290cd190789-sup-225160_2_supp_6246232_q954c0.docx [file 21598290cd190789-sup-225160_2_supp_6246232_q954c0.docx]

Supplementary Table 1. List of the main targets and number of probes included in the small-molecule inhibitors library (related to Figure 1 and Supplementary Table 2).

| **Inhibitors of chromatin modifying enzymes** |  |
| --- | --- |
| Histone Acetyltransferases | 4 |
| Histone Deacetylases (HDAC) | 32 |
| Histone Demethylases | 9 |
| Histone Methyltransferases | 23 |
| Epigenetic Reader Domain | 18 |
| **Other Inhibitors (target)** |  |
| DNA Methyltransferases | 7 |
| Aurora Kinase | 20 |
| HIF | 3 |
| JAK | 20 |
| PARP | 11 |
| Pim | 4 |
| Sirtuin | 5 |
| PRMT | 2 |
| Citrullination | 1 |
| CBP/p300 | 1 |
| WDR5 | 1 |
| MAO | 1 |
| CHK1 | 1 |
| **Retinoids** |  |
| RAR/RXR agonists | 22 |
| RAR/RXR antagonists | 6 |
| LXR/RXR agonists | 2 |
| **Other drugs** |  |
| Chemotherapeutic agents | 20 |
