# Supplementary material for: EZH2 -Deficient T-cell Acute Lymphoblastic Leukemia Is Sensitized to CHK1 Inhibition through Enhanced Replication Stress
Source: Oxford University Press journal article supplement (doi:10.1158/2159-8290.cd-19-0789), 2020-04-29
Supplement: 21598290cd190789-sup-225160_2_supp_6246242_q954yt.docx [file 21598290cd190789-sup-225160_2_supp_6246242_q954yt.docx]

**Supplemental information**

**Supplementary Table 1: List of the main targets and number of probes included in the small-molecule inhibitors library (related to Fig. 1)**

**Supplementary Table 2 (Excel file): Cell viability data from the small-molecule drug screening in EZH2-WT and EZH2-KO1 cells (related to Fig. 1)**

**Supplementary Table 3 (Excel file): Mutations identified by exome sequencing in Liu et al., 2017 T-ALL cohort (related to Fig. 5G)**
